# Supplementary material for: The Influence of Gamma Radiation on Different Gelatin Nanofibers and Gelatins
Source: MDPI journal article supplement (doi:10.3390/gels10040226), 2024-03-26
Supplement: s1 [file s1]

# The Influence of Gamma Radiation on Different Gelatin Nanofibers and Gelatins

Carmen Gaidau<sup>1</sup>, Maria Râpă<sup>2</sup>, Gabriela Ionita<sup>3</sup>, Ioana Rodica Stanculescu<sup>4,5</sup>, Traian Zaharescu<sup>6</sup>, Roxana-Rodica Constantinescu<sup>1</sup>, Andrada Lazea-Stoyanova<sup>7</sup> and Maria Stanca<sup>1\*</sup>

## 2.4. Chemiluminescence Spectroscopy

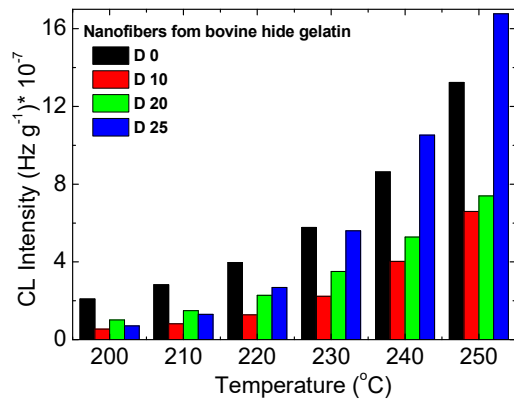

a)

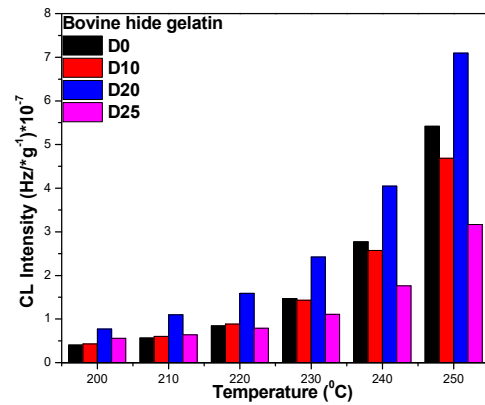

b)

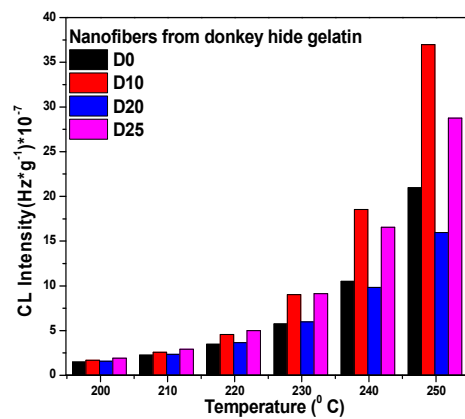

c)

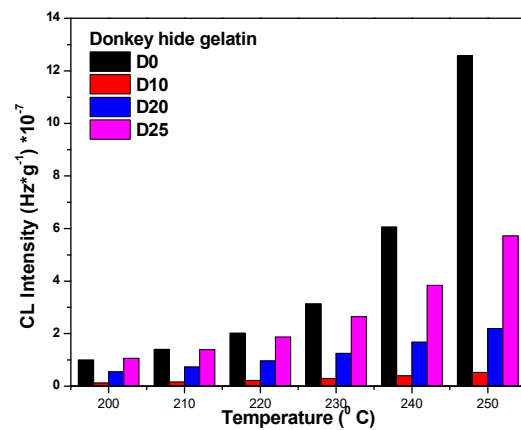

d)

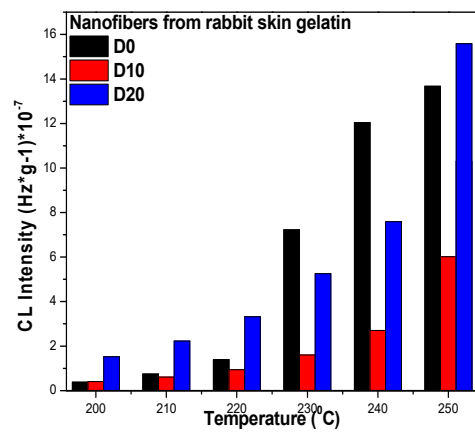

e)

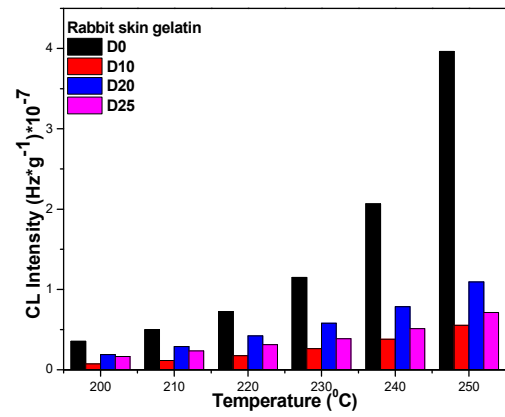

f)

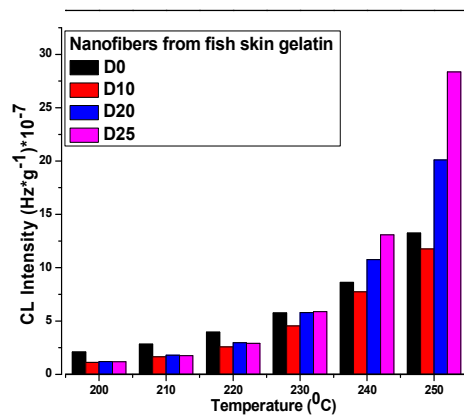

g)

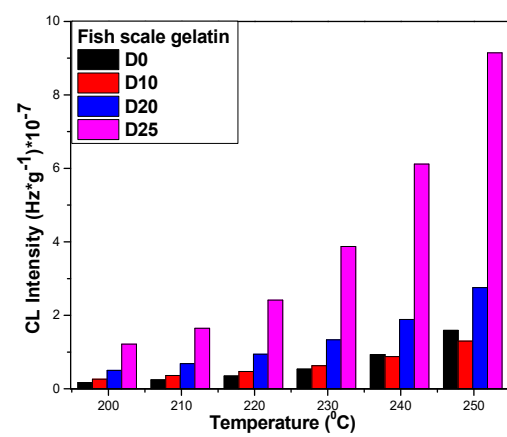

h)

**Figure S1.** Chemiluminescence intensity at 200-250°C for bovine gelatin nanofibers (a) and bovine gelatin (b); donkey gelatin nanofibers (c) and donkey gelatin (d); rabbit gelatin nanofibers (e) and rabbit gelatin (f); fish scale gelatin nanofibers (g) and fish scales gelatin (h).

## 2.5. EPR Spectroscopy

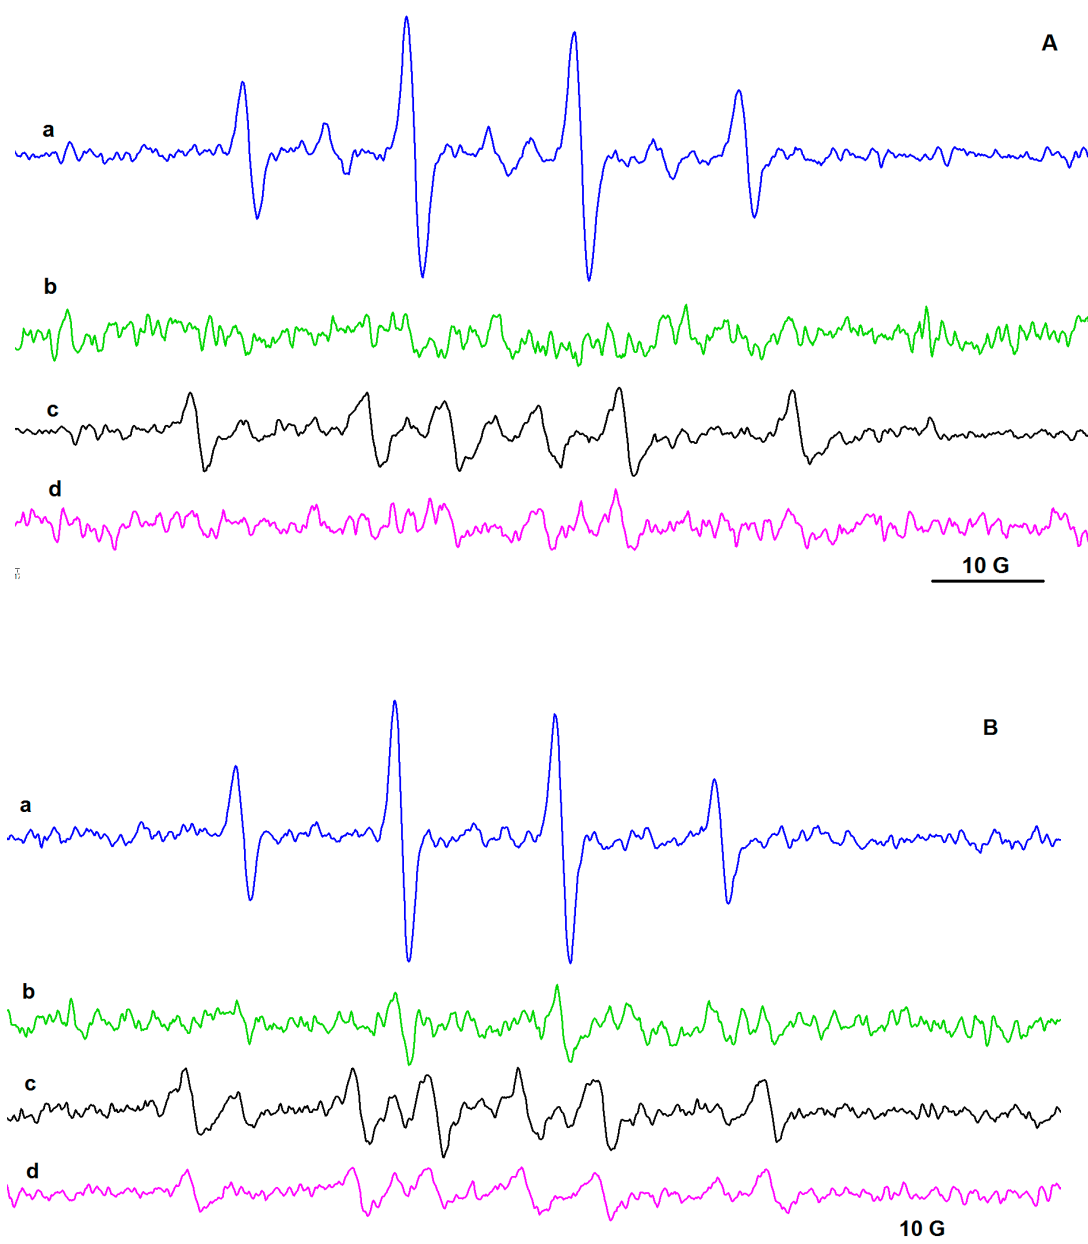

**Figure S2.** A) Non-normalized EPR spectra of DMPO adducts from bovine (a), rabbit (b), donkey (c) and fish gelatin (d) nanofibers samples; B) Non-normalized EPR spectra of DMPO adducts from bovine (a), rabbit (b), donkey (c) and fish gelatin (d) nanofibers samples recorded after 30 minutes.

## 2.6. ATR-FTIR Spectroscopy

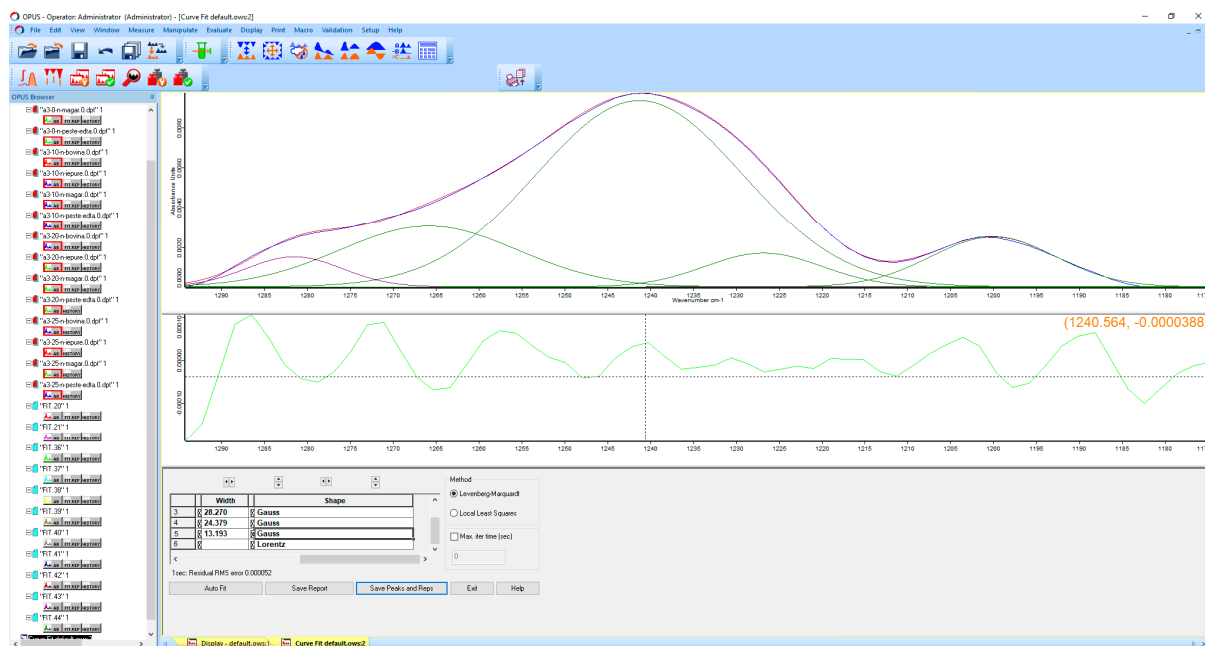

**Figure S3** Deconvolution of Amide III band of rabbit gelatine nanofibers irradiated at 20 kGy

**Table S1.** S1 Deconvolution of Amide III with ratios of secondary structures

| Sample                                                    | Deconvolution of Amide III with ratios of secondary structures, % |                                   |                                  |                                      |                                  |
|-----------------------------------------------------------|-------------------------------------------------------------------|-----------------------------------|----------------------------------|--------------------------------------|----------------------------------|
|                                                           | 1200 cm <sup>-1</sup><br>side amino<br>acids                      | 1226 cm <sup>-1</sup><br>β-sheets | 1240 cm <sup>-1</sup><br>α-helix | 1260 cm <sup>-1</sup><br>random coil | 1281 cm <sup>-1</sup><br>β-turns |
| Nanofibers from bovine hide gelatin                       | 7.15                                                              | 8.84                              | 48.31                            | 30.22                                | 5.46                             |
| Nanofibers from bovine hide gelatin, irradiated at 10 kGy | 7.08                                                              | 8.29                              | 43.44                            | 34.80                                | 6.36                             |
| Nanofibers from bovine hide gelatin, irradiated at 20 kGy | 9.28                                                              | 8.10                              | 51.41                            | 26.06                                | 5.13                             |
| Nanofibers from bovine hide gelatin, irradiated at 25 kGy | 8.97                                                              | 7.45                              | 51.81                            | 26.37                                | 5.37                             |
| Nanofibers from rabbit skin gelatin                       | 8.99                                                              | 7.09                              | 55.42                            | 22.76                                | 5.72                             |
| Nanofibers from rabbit skin gelatin, irradiated at 10 kGy | 8.17                                                              | 11.12                             | 53.78                            | 21.33                                | 5.58                             |
| Nanofibers from rabbit skin gelatin, irradiated at 20 kGy | 9.79                                                              | 3.50                              | 62.28                            | 19.48                                | 4.93                             |
| Nanofibers from rabbit skin gelatin, irradiated at 25 kGy | 9.81                                                              | 6.83                              | 55.29                            | 22.52                                | 5.53                             |
| Nanofibers from donkey hide gelatin                       | 10.05                                                             | 5.75                              | 63.28                            | 16.36                                | 4.53                             |
| Nanofibers from donkey hide gelatin, irradiated at 10 kGy | 9.83                                                              | 5.59                              | 62.55                            | 17.11                                | 4.90                             |

|                                                           |       |      |       |       |      |
|-----------------------------------------------------------|-------|------|-------|-------|------|
| Nanofibers from donkey hide gelatin, irradiated at 20 kGy | 9.95  | 6.30 | 61.79 | 17.33 | 4.61 |
| Nanofibers from donkey hide gelatin, irradiated at 25 kGy | 10.29 | 5.31 | 61.54 | 18.47 | 4.37 |
| Nanofibers from fish scales gelatin                       | 7.88  | 2.33 | 69.26 | 16.85 | 3.66 |
| Nanofibers from fish scales gelatin, irradiated at 10 kGy | 7.89  | 5.29 | 62.93 | 19.82 | 4.06 |
| Nanofibers from fish scales gelatin, irradiated at 20 kGy | 7.72  | 4.46 | 61.33 | 22.39 | 4.07 |
| Nanofibers from fish scales gelatin, irradiated at 25 kGy | 7.76  | 4.69 | 61.39 | 21.88 | 4.25 |
